# Supplementary material
Source: Springer Nature journal article supplement (https://www.springermedizin.de/resource/supplementary/12879_2012_2062_MOESM3_ESM.pdf/9443380)

# Fagan's nomogram

Prior Probability (%)

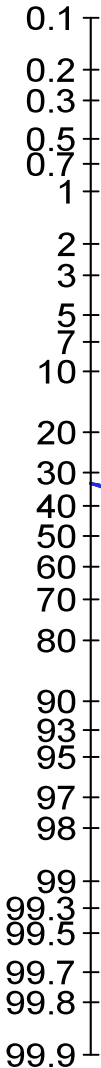

Likelihood Ratio

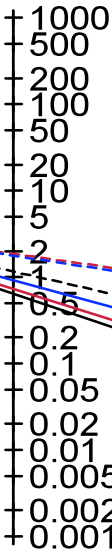

Posterior Probability (%)

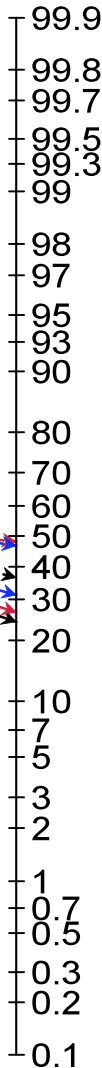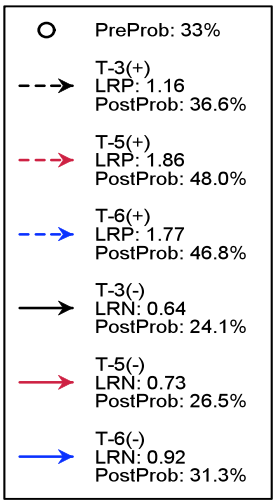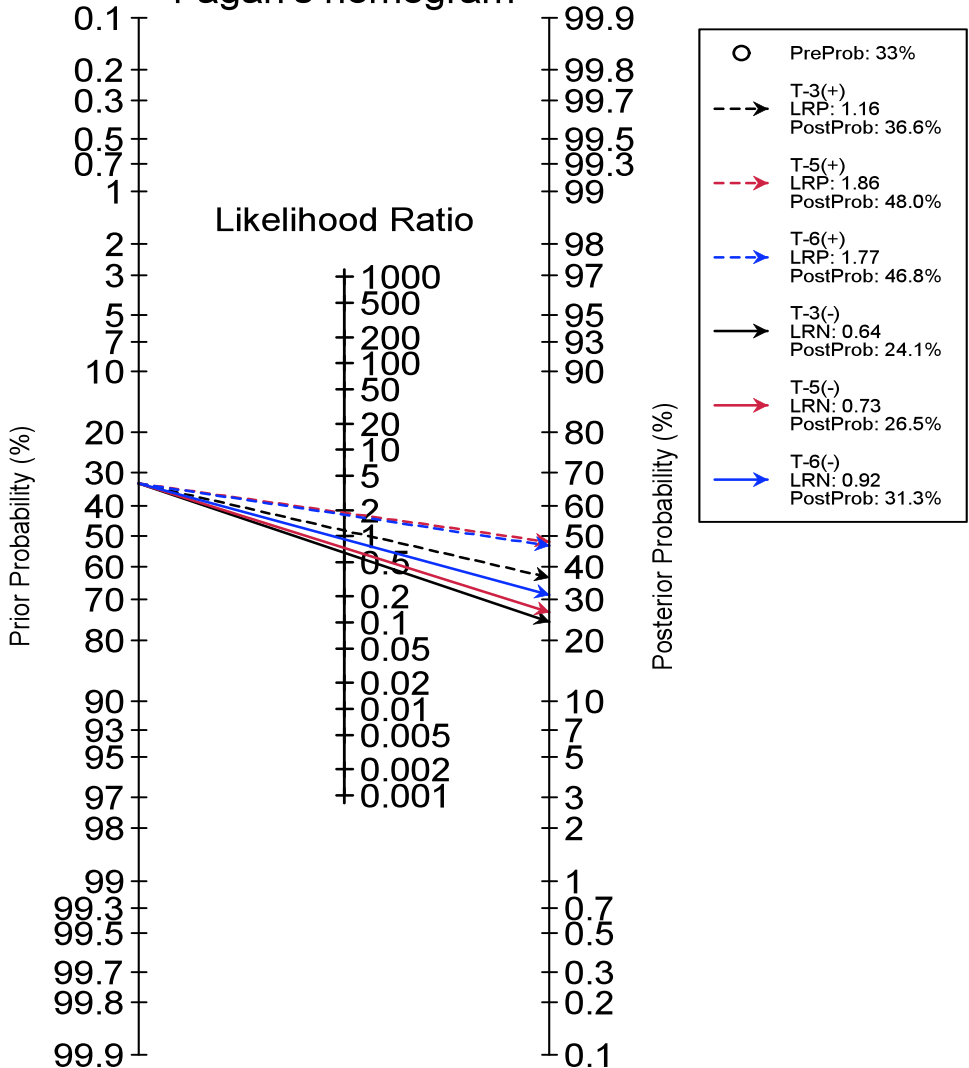

Supplement: MOESM3 [file 9443380]
